# Supplementary material for: Foxp3+ Regulatory T Cells Delay Expulsion of Intestinal Nematodes by Suppression of IL-9-Driven Mast Cell Activation in BALB/c but Not in C57BL/6 Mice
Source: PLOS journal article supplement (doi:10.1371/journal.ppat.1003913), 2014-02-06
Supplement: S1 (10.1371/journal.ppat.1003913.s001) [file journal.ppat.1003913.s001]

**Figure S1**

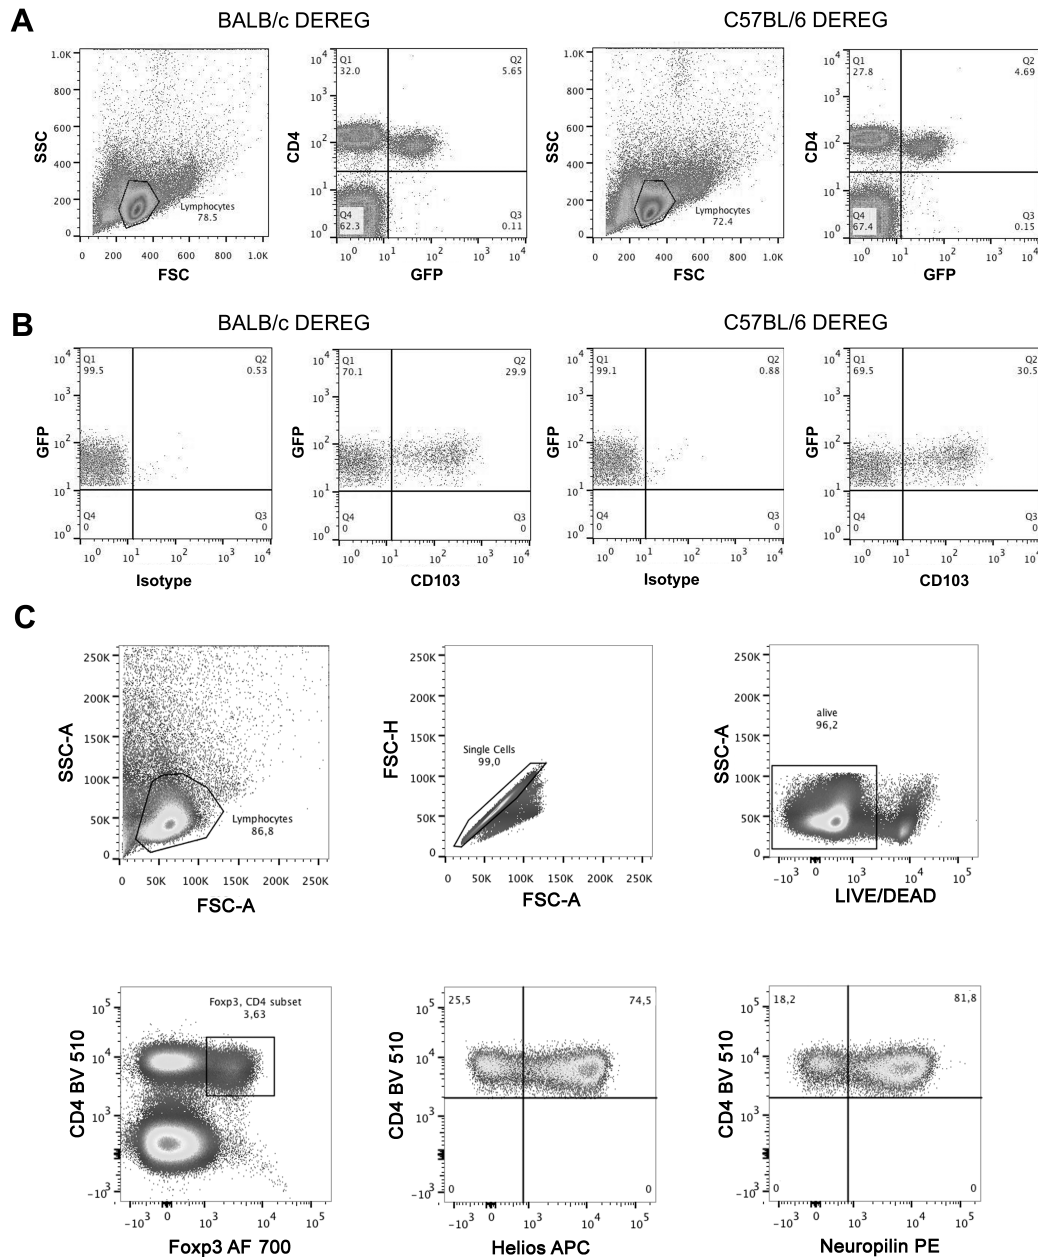

### S1: Gating strategy for Figure 1

Naïve or *S. ratti*-infected mice were sacrificed and single cell lymph node cultures prepared. **AB**: Cells were stained with Allophycocyanin (APC)-labeled anti-CD4 (clone RM4-5) and Phycoerythrin (PE)-labeled isotype control or PE-labeled anti-CD103 (clone 2E7) and analyzed on a BD FACSCalibur. **A**: Shown are representative dotplots for identification of Treg and Teff as CD4<sup>+</sup>GFP<sup>+</sup> and CD4<sup>+</sup>GFP<sup>-</sup> cells in the lymphocyte gate. **B**: Shown are representative dotplots for identification of activated Treg as CD4<sup>+</sup>GFP<sup>+</sup>CD103<sup>+</sup> cells in the lymphocyte gate. **C**: Lymph node cells were stained with LIVE/DEAD Fixable Blue Dead Cell Stain, followed by surface staining with PE-labeled anti CD304 (Neuropilin-1; clone 3E12) and Brilliant Violet 510-labeled anti-CD4 (clone RM4-5). After fixation and permeabilization, cells were stained with Alexa Fluor 700-labeled anti-Foxp3 (clone FJK-16s) and APC-labeled anti-Helios (clone 22F6). Samples were measured on a LSRII. Shown are representative dotplots for exclusion of doublets and dead cells and subsequent identification of Helios<sup>+</sup> and Neuropilin<sup>+</sup> cells within the CD4<sup>+</sup>Foxp3<sup>+</sup> population.
