# Supplementary material for: Foxp3+ Regulatory T Cells Delay Expulsion of Intestinal Nematodes by Suppression of IL-9-Driven Mast Cell Activation in BALB/c but Not in C57BL/6 Mice
Source: PLOS journal article supplement (doi:10.1371/journal.ppat.1003913), 2014-02-06
Supplement: S5 (10.1371/journal.ppat.1003913.s005) [file journal.ppat.1003913.s005]

## Figure S5: Intracellular IL-9 staining

**S5A:** Representative gating strategy for exclusion of doublets and dead cells is shown.

**S5B:** Representative plots for identification of IL-9<sup>+</sup> CD4<sup>+</sup> cells in Th9 polarized spleen cell cultures.

**S5C:** Representative plots for identification of IL-9<sup>+</sup> CD4<sup>+</sup> and CD4<sup>-</sup> cells in spleen and MLN from *S. ratti* infected and DT treated BALB/c and BALB/c DEREK mice.

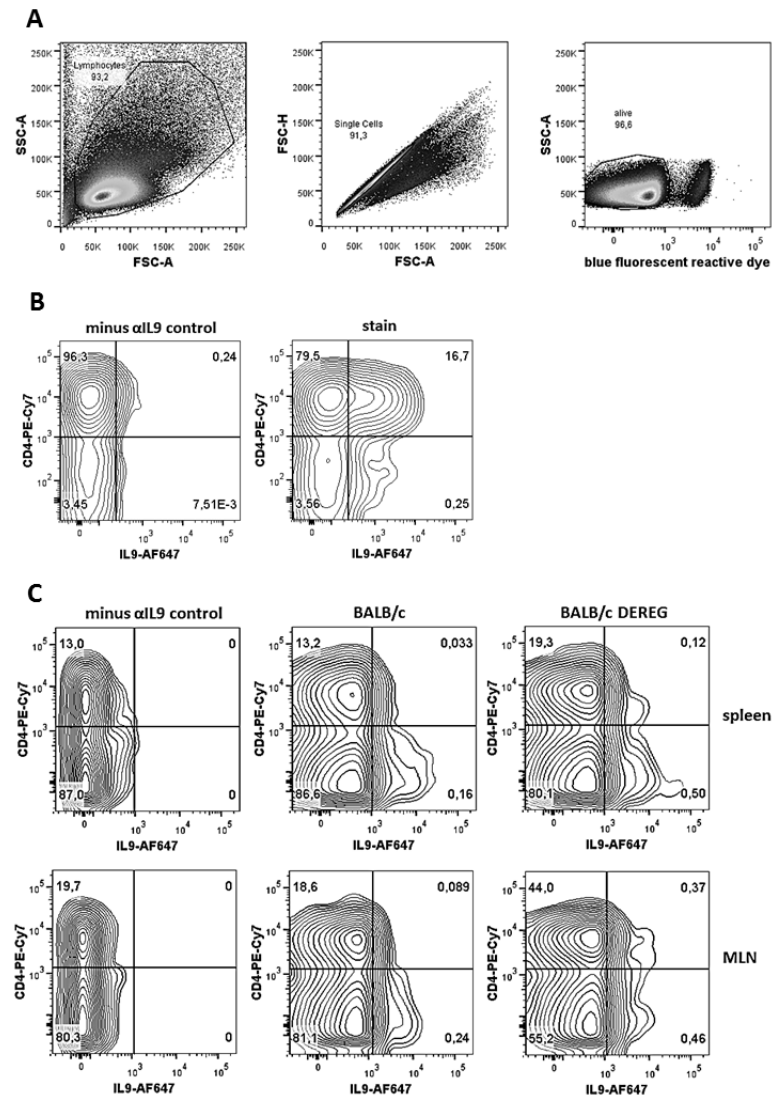

with 500 ng/mL PMA (Phorbol-12-myristat-13-acetat, Sigma) and 500 ng/mL Ionomycin (Sigma) in the presence of 1x Brefeldin A Solution (Biolegend) at 37°C and 5% CO<sub>2</sub>. Cells were first stained with LIVE/DEAD Fixable Blue Dead Cell Stain (1:1000, Invitrogen) in PBS for 30 min at 4°C. Cells were washed and subsequently surface stained with PE-Cy7-labeled anti-CD4 (clone RM4-5, Biolegend) for 30 min at 4°C. Cells were fixed and permeabilized using Foxp3-Fixation/Permeabilization Kit (eBioscience) according to the manufacturers recommendation. Intracellular IL-9 was detected using Alexa Fluor 647-labeled anti-mouse IL-9 (clone RM9A4, Biolegend) for 30 min at room temperature. Cells were washed and analyzed on a LSRII.

### Th9 polarization:

For Th9 polarization T cells were isolated from spleens using CD4<sup>+</sup> T cell Isolation Kit II (MACS Miltenyi Biotec) according to the manufacturers recommendation.  $1 \times 10^7$  CD4<sup>+</sup> T cells were cultured in 10 mL RPMI medium on purified anti-mouse CD3 $\epsilon$  (clone 145-2C11) coated cell culture dishes in the presence of 5  $\mu$ g/mL purified anti-mouse CD28 (clone 37.51), 10  $\mu$ g/mL purified anti-mouse IFN- $\gamma$  (clone AN-18), 20 ng/mL recIL-2, 20 ng/mL recIL-4, 10 ng/mL human TGF- $\beta$  (all Biolegend) for 3 days at 37°C and 5% CO<sub>2</sub>.

### Detection of *S. ratti*-induced IL-9 producing cells:

To detect IL-9 producing cells ex vivo BALB/c and BALB/c DEREK mice were infected s.c. with 2000 iL3 *S. ratti*. Mice received 0.5  $\mu$ g DT on three consecutive days starting one day before infection. Mice were sacrificed day 6 p.i and reduced parasite burden in the small intestine of Treg depleted BALB/c DEREK mice compared to non depleted BALB/c mice was verified (data not shown). Spleens and mesenteric lymph nodes (MLN) were prepared, stimulated and analyzed for IL-9 production.

### Intracellular IL-9 staining:

$2-3 \times 10^6$  cells were incubated for 6 h
